# Supplementary material for: Trends in C–O and N–O bond scission on rutile oxides described using oxygen vacancy formation energies
Source: PubMed Central journal article supplement — Chem Sci. 2020 Mar 23;11(16):4119–24. doi: 10.1039/d0sc00534g (PMC8152721; doi:10.1039/d0sc00534g), 2020-03-23
Supplement: SC-011-D0SC00534G-s001.pdf [file SC-011-D0SC00534G-s001.pdf]

**Electronic Supplementary Information for:**

**Trends in C-O and N-O bond scission on rutile oxides  
described by oxygen vacancy formation energies**

*Hai-Yan Su, Xiufang Ma, Keju Sun\*, Chenghua Sun, Yongjun Xu, and Federico Calle-Vallejo\**

|                                                                                                                                                   |          |
|---------------------------------------------------------------------------------------------------------------------------------------------------|----------|
| <b>S1.</b> DFT-calculated and experimental lattice constants of 3d rutile oxides .....                                                            | <b>1</b> |
| <b>S2.</b> Effect of dispersion corrections on $\Delta E_{Ads}$ on 3d rutile (110) surfaces.....                                                  | <b>2</b> |
| <b>S3.</b> Calculated energetic and geometric data for C-O and N-O bond scission on 3d rutile (110) surfaces.....                                 | <b>3</b> |
| <b>S4.</b> $\Delta E_{Ads}$ of the intermediates on 3d rutile (110) surfaces .....                                                                | <b>4</b> |
| <b>S5.</b> Vacancy formation energies ( $\Delta E_{Vac}$ ) .....                                                                                  | <b>5</b> |
| <b>S6.</b> Effect of +U and dispersion corrections on $\Delta E_{Ads}$ , $\Delta E_{Diss}$ and $\Delta E_{act}$ on 3d rutile (110) surfaces ..... | <b>6</b> |
| <b>S7.</b> Optimized configurations for the adsorption of intermediates on 3d rutile (110) surfaces .....                                         | <b>8</b> |
| <b>S7.</b> References.....                                                                                                                        | <b>8</b> |

**Table S1.** Comparison between DFT-calculated and experimental (EXP) lattice constants (in Å) of 3d rutile oxides.

| Rutile           | DFT       | EXP       |
|------------------|-----------|-----------|
| TiO <sub>2</sub> | 2.97,4.67 | 2.96,4.59 |
| VO <sub>2</sub>  | 2.84,4.59 | 2.85,4.56 |
| CrO <sub>2</sub> | 2.93,4.45 | 2.92,4.54 |
| MnO <sub>2</sub> | 2.89,4.45 | 2.88,4.40 |
| FeO <sub>2</sub> | 2.80,4.44 |           |
| CoO <sub>2</sub> | 2.88,4.31 |           |
| NiO <sub>2</sub> | 2.93,4.35 |           |

**Table S2.** Adsorption energies ( $\Delta E_{Ads}$  in eV) of  $\text{CO}_2$  with or without dispersion corrections<sup>1</sup> on the  $3d$  rutile (110) surfaces.

| Rutile         | No dispersion | Dispersion |
|----------------|---------------|------------|
| $\text{TiO}_2$ | -0.25         | -0.51      |
| $\text{VO}_2$  | -0.20         | -0.42      |
| $\text{CrO}_2$ | -0.17         | -0.38      |
| $\text{MnO}_2$ | -0.06         | -0.23      |
| $\text{FeO}_2$ | 0.00          | -0.16      |
| $\text{CoO}_2$ | -0.06         | -0.23      |
| $\text{NiO}_2$ | -0.04         | -0.20      |

**Table S3.** Calculated activation energies ( $\Delta E_{Act}$  in eV), reaction energies ( $\Delta E_{Diss}$  in eV) and C(N)-O distance ( $d$  in Å) at the TSs for C-O and N-O bond scission on 3d rutile (110) surfaces.

| Rutile           | CO <sub>2</sub> →CO+O |                   |      | N <sub>2</sub> O→N <sub>2</sub> +O |                   |      |
|------------------|-----------------------|-------------------|------|------------------------------------|-------------------|------|
|                  | $\Delta E_{Act}$      | $\Delta E_{Diss}$ | $d$  | $\Delta E_{Act}$                   | $\Delta E_{Diss}$ | $d$  |
| TiO <sub>2</sub> | 0.62                  | -0.51             | 1.28 | 0.13                               | -3.80             | 1.27 |
| VO <sub>2</sub>  | 1.29                  | 0.29              | 1.59 | 0.43                               | -3.01             | 1.35 |
| CrO <sub>2</sub> | 1.65                  | 1.22              | 1.73 | 0.57                               | -2.03             | 1.44 |
| MnO <sub>2</sub> | 1.85                  | 1.49              | 2.05 | 0.67                               | -1.46             | 1.36 |
| FeO <sub>2</sub> | 2.24                  | 1.81              | 1.91 | 0.83                               | -1.27             | 1.42 |
| CoO <sub>2</sub> | 2.36                  | 2.22              | 2.12 | 0.89                               | -0.53             | 1.49 |
| NiO <sub>2</sub> | 3.23                  | 3.19              | 2.42 | 1.25                               | 0.23              | 1.55 |

  

| Rutile           | CH <sub>3</sub> OH→CH <sub>3</sub> +OH |                   |      | NH <sub>2</sub> OH→NH <sub>2</sub> +OH |                   |      |
|------------------|----------------------------------------|-------------------|------|----------------------------------------|-------------------|------|
|                  | $\Delta E_{Act}$                       | $\Delta E_{Diss}$ | $d$  | $\Delta E_{Act}$                       | $\Delta E_{Diss}$ | $d$  |
| TiO <sub>2</sub> | 1.03                                   | -0.44             | 2.05 | 0.18                                   | -2.67             | 1.46 |
| VO <sub>2</sub>  | 1.25                                   | 0.55              | 2.55 | 0.17                                   | -1.65             | 1.45 |
| CrO <sub>2</sub> | 1.56                                   | 0.76              | 2.85 | 0.49                                   | -1.52             | 1.85 |
| MnO <sub>2</sub> | 1.49                                   | 0.54              | 2.81 | 0.50                                   | -1.48             | 1.89 |
| FeO <sub>2</sub> | 1.83                                   | 0.95              | 2.75 | 0.59                                   | -0.59             | 1.99 |
| CoO <sub>2</sub> | 2.00                                   | 1.03              | 2.75 | 0.65                                   | -0.78             | 2.55 |
| NiO <sub>2</sub> | 2.21                                   | 1.40              | 2.55 | 0.94                                   | -0.03             | 2.65 |

**Table S4.** Adsorption energies ( $\Delta E_{Ads}$  in eV) of the intermediates on the 3d rutile (110) surfaces.

| Rutile           | $\Delta E_{CO_2}$ | $\Delta E_{CO}$ | $\Delta E_O$ | $\Delta E_{N_2O}$ | $\Delta E_{N_2}$ |
|------------------|-------------------|-----------------|--------------|-------------------|------------------|
| TiO <sub>2</sub> | -0.25             | -0.13           | -3.95        | -0.20             | -0.04            |
| VO <sub>2</sub>  | -0.20             | -0.07           | -3.17        | -0.14             | -0.03            |
| CrO <sub>2</sub> | -0.17             | -0.21           | -2.06        | -0.12             | -0.03            |
| MnO <sub>2</sub> | -0.06             | -0.01           | -1.52        | -0.04             | -0.03            |
| FeO <sub>2</sub> | 0.00              | -0.16           | -1.29        | 0.02              | -0.02            |
| CoO <sub>2</sub> | -0.06             | -0.37           | -0.61        | -0.03             | -0.03            |
| NiO <sub>2</sub> | -0.04             | -0.02           | 0.15         | -0.03             | -0.01            |

| Rutile           | $\Delta E_{CH_3OH}$ | $\Delta E_{CH_3}$ | $\Delta E_{OH}$ | $\Delta E_{NH_2OH}$ | $\Delta E_{NH_2}$ |
|------------------|---------------------|-------------------|-----------------|---------------------|-------------------|
| TiO <sub>2</sub> | -1.00               | -1.04             | -4.66           | -0.86               | -2.19             |
| VO <sub>2</sub>  | -0.90               | -0.51             | -4.06           | -0.73               | -1.58             |
| CrO <sub>2</sub> | -0.91               | -0.67             | -3.67           | -0.74               | -1.54             |
| MnO <sub>2</sub> | -0.76               | -0.82             | -3.61           | -0.58               | -1.18             |
| FeO <sub>2</sub> | -0.68               | -0.88             | -3.21           | -0.44               | -1.11             |
| CoO <sub>2</sub> | -0.83               | -0.98             | -3.10           | -0.64               | -1.17             |
| NiO <sub>2</sub> | -0.65               | -1.03             | -2.68           | -0.52               | -0.94             |

**Table S5.** Vacancy formation energies ( $\Delta E_{vac}$  in eV) for the 3d rutile (110) surfaces.

| Rutile           | $\Delta E_{vac}$ |
|------------------|------------------|
| TiO <sub>2</sub> | 3.95             |
| VO <sub>2</sub>  | 3.17             |
| CrO <sub>2</sub> | 2.06             |
| MnO <sub>2</sub> | 1.52             |
| FeO <sub>2</sub> | 1.29             |
| CoO <sub>2</sub> | 0.61             |
| NiO <sub>2</sub> | -0.15            |

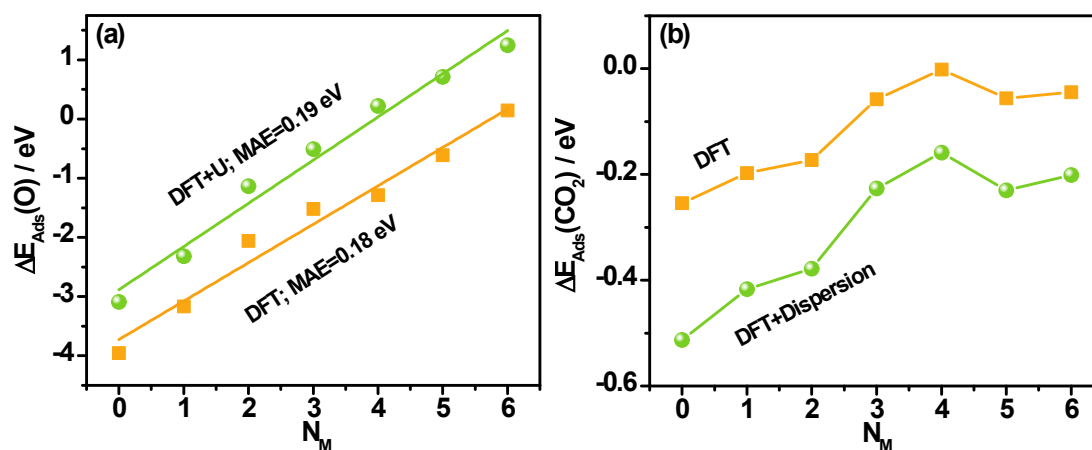

**Figure S1.** (a) Effect of +U on the adsorption energy of oxygen ( $\Delta E_{\text{Ads}}(\text{O})$ ) using  $\frac{1}{2}\text{O}_2$  as a reference. (b) Effect of dispersion on the adsorption energy of  $\text{CO}_2$ ,  $\Delta E_{\text{Ads}}(\text{CO}_2)$ , at the bridge oxygen vacancy on rutile-type (110) surfaces.  $N_M$  is the number of outer electrons of 3d metals in the rutile oxides, which are calculated based on the periodic table and the oxidation state of the oxide.<sup>2</sup> For instance, Mn cations in  $\text{MnO}_2$  have 3 outer electrons, as Mn's electronic distribution ends at  $3s^24d^5$  and its oxidation state is +4. The U values of 5.5, 3.32, 2.1, 3, 4.9, 5.37 and 6.37 are used for Ti to Ni, taken from refs 3-7.

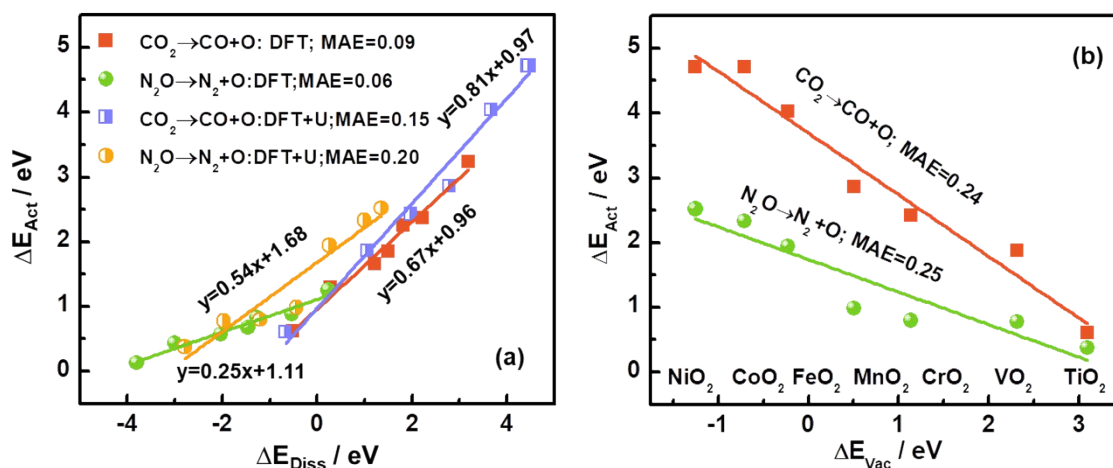

**Figure S2.** (a) BEP Relations for  $\text{CO}_2$  and  $\text{N}_2\text{O}$  scission at the (110) surface of rutile oxides. Data are provided for fully converged PBE calculations and single-point PBE+U calculations. (b) Correlation between the activation energies for  $\text{CO}_2$  and  $\text{N}_2\text{O}$  scission (single-point PBE+U calculations) with the formation energies of oxygen vacancies (fully relaxed PBE+U calculations). The mean absolute errors (MAEs, in eV) are provided in each case.

**Note:** In line with the trends for oxygen adsorption energies in Fig. S1(a), the slopes are steeper upon including U in the calculations. The larger MAEs with respect to PBE are presumably due to the use of single-point calculations to assess the reaction energies and barriers, instead of fully relaxed data.



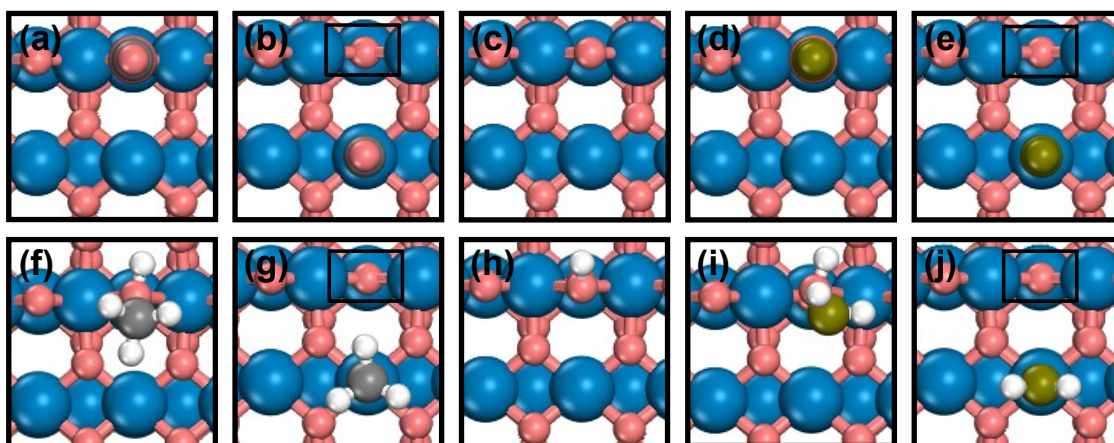

**Figure S3.** Optimized configurations for (a) CO<sub>2</sub>, (b) CO, (c) O, (d) N<sub>2</sub>O, (e) N<sub>2</sub>, (f) CH<sub>3</sub>OH, (g) CH<sub>3</sub>, (h) OH, (i) NH<sub>2</sub>OH, and (j) NH<sub>2</sub> adsorption on 3d rutile (110) surfaces. The blue, vermilion, grey, ochre and white balls represent 3d metals (Ti-Ni), O, C, N and H atoms, respectively. The bridge O vacancy is denoted by the rectangle on the reduced surfaces.

## References

1. S. Grimme, J. Antony, S. Ehrlich and H. Krieg, *J. Chem. Phys.*, 2010, **132**, 154104.
2. F. Calle-Vallejo, N. G. Inoglu, H.-Y. Su, J. I. Martinez, I. C. Man, M. T. M. Koper, J. R. Kitchin and J. Rossmeisl, *Chem. Sci.*, 2013, **4**, 1245-1249.
3. A. C. Papageorgioua, N. S. Beglitisb, C. L. Panga, G. Teobaldic, G. Cabailha, Q. Chen, A. J. Fisherb, W. A. Hoferc and G. Thorntona, *P. Natl. Acad. Sci. USA*, 2010, **107**, 2391-2396.
4. S. Biermann, A. Poteryaev, A. I. Lichtenstein and A. Georges, *Phys. Rev. Lett.*, 2005, **94**, 026404.
5. H. Sims, S. J. Oset, W. H. Butler, James M. MacLaren and M. Marsman, *Phys. Rev. B: Condens. Matter Mater. Phys.*, 2010, **81**, 224436.
6. C. Franchini, R. Podloucky, J. Paier, M. Marsman and G. Kresse, *Phys. Rev. B: Condens. Matter Mater. Phys.*, 2007, **75**, 195128.
7. F. Zhou, M. Cococcioni, C. A. Marianetti, D. Morgan and G. Ceder, *Phys. Rev. B: Condens. Matter Mater. Phys.*, 2004, **70**, 235121.
