# Supplementary material for: Trends in C–O and N–O bond scission on rutile oxides described using oxygen vacancy formation energies
Source: PubMed Central journal article supplement — Chem Sci. 2020 Mar 23;11(16):4119–24. doi: 10.1039/d0sc00534g (PMC8152721; doi:10.1039/d0sc00534g), 2020-03-23
Supplement: SC-011-D0SC00534G-s002.pdf [file SC-011-D0SC00534G-s002.pdf]

# Oxygen Vacancies: An Easier Road to Predicting Metal Oxide Catalysis

Metal oxide catalysts have numerous industrial applications, so it is important to understand the dynamics of their catalytic activities

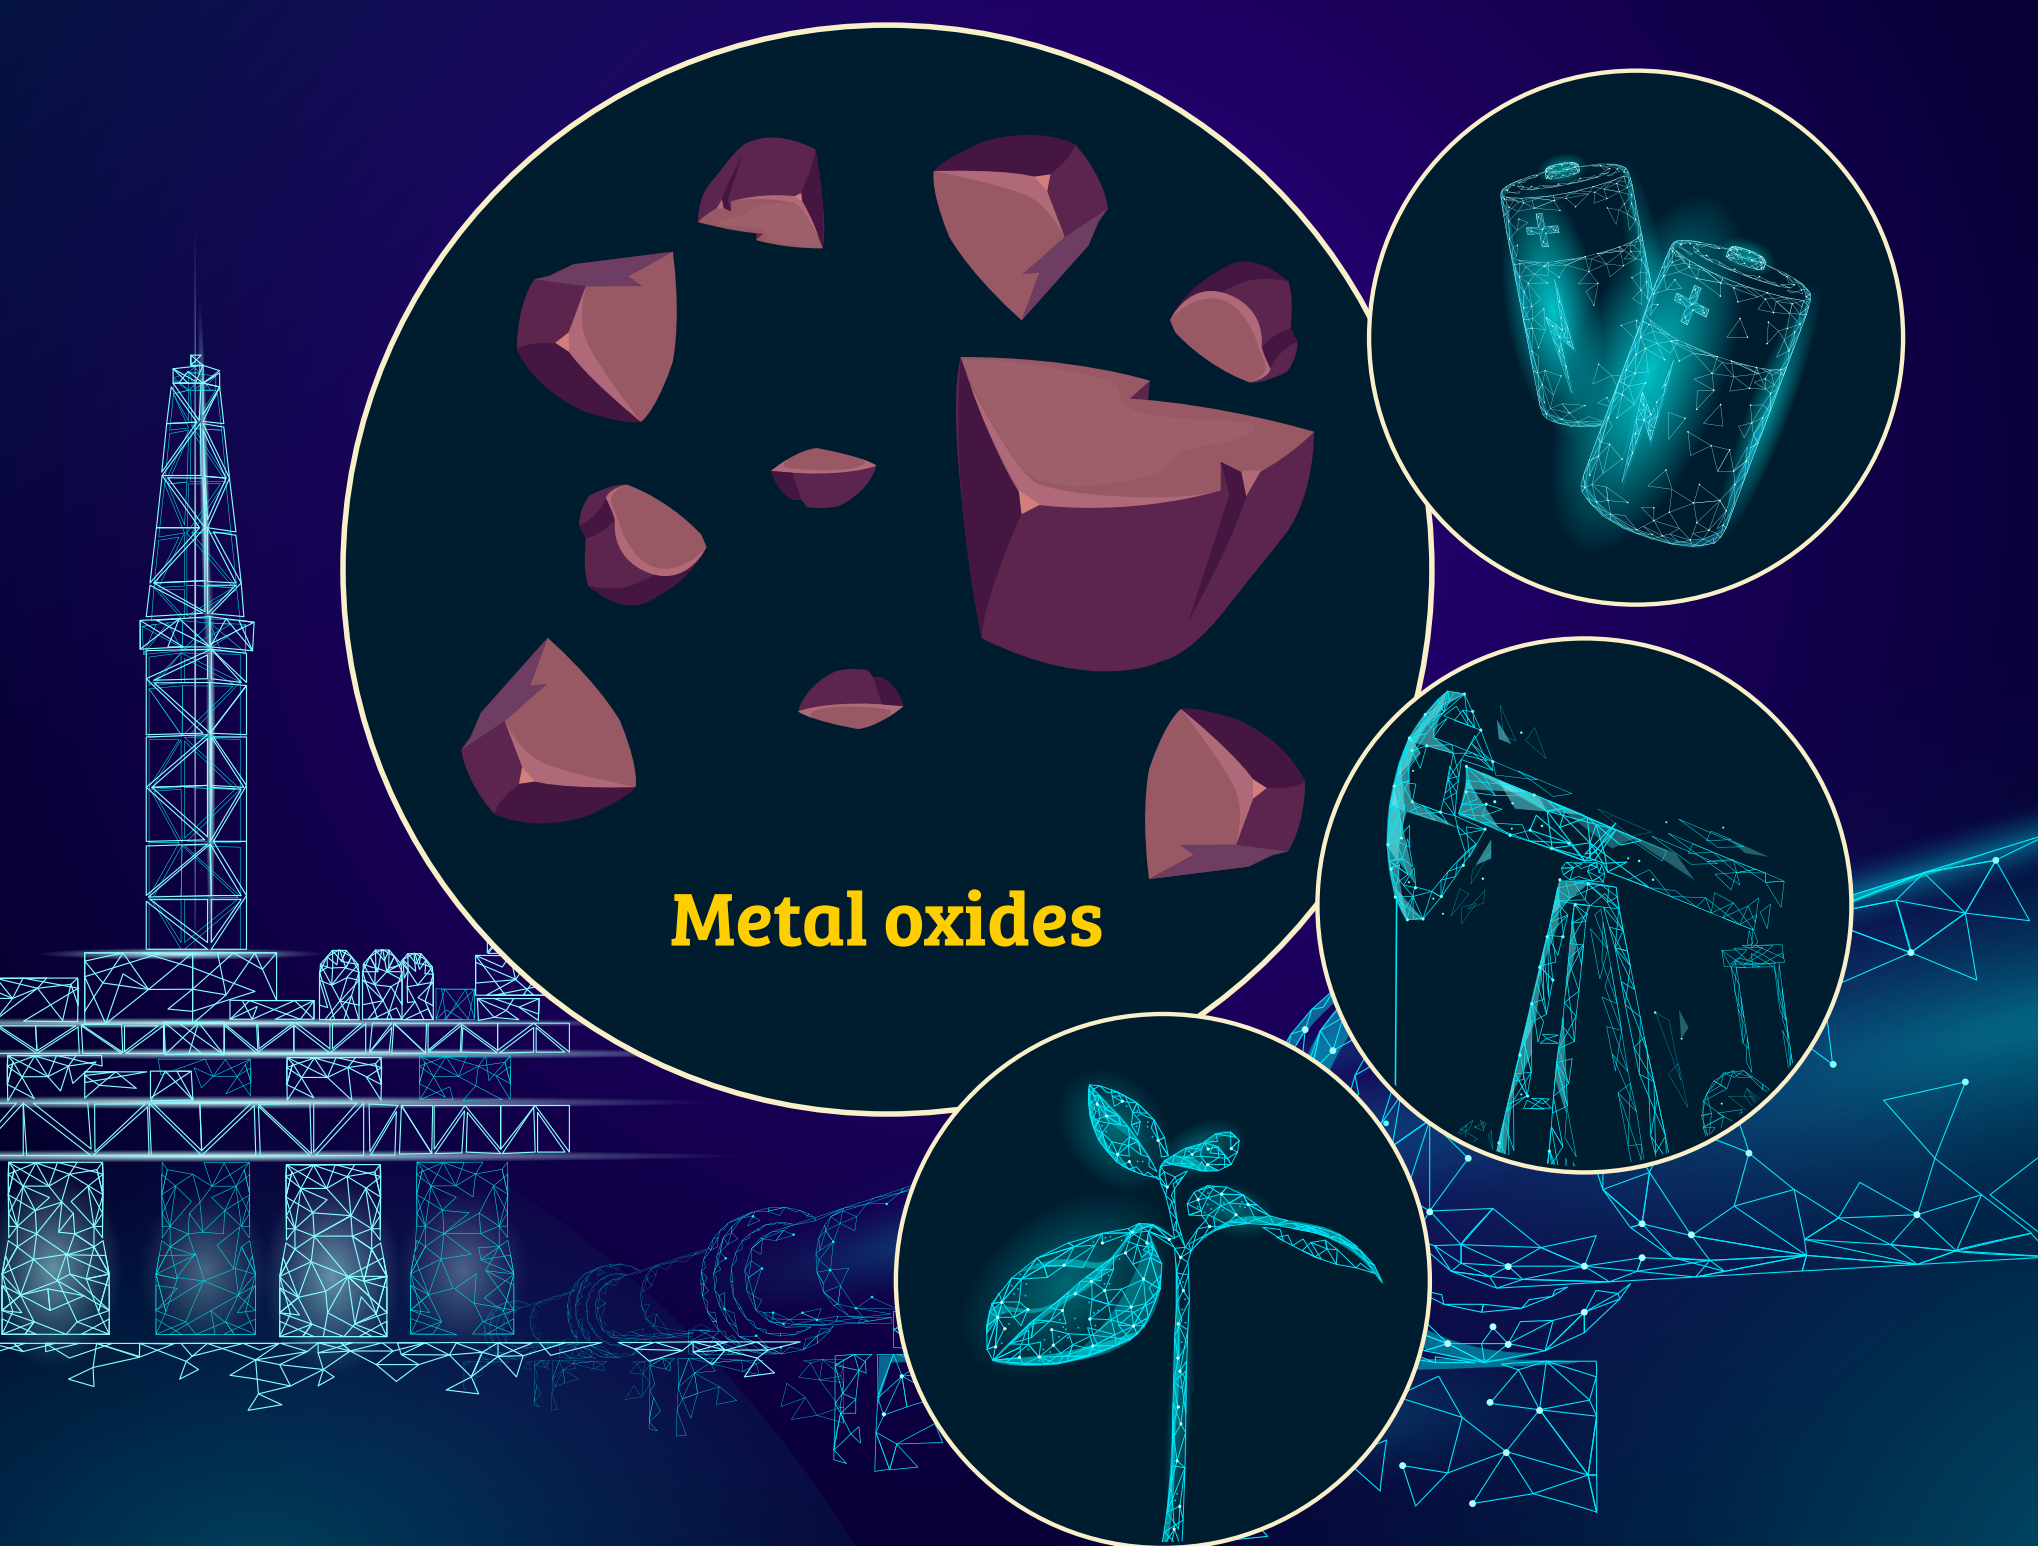

However, the energy input required for catalysis on their surfaces is tedious to calculate

Can the energy input be estimated using a simpler property of metal oxides?

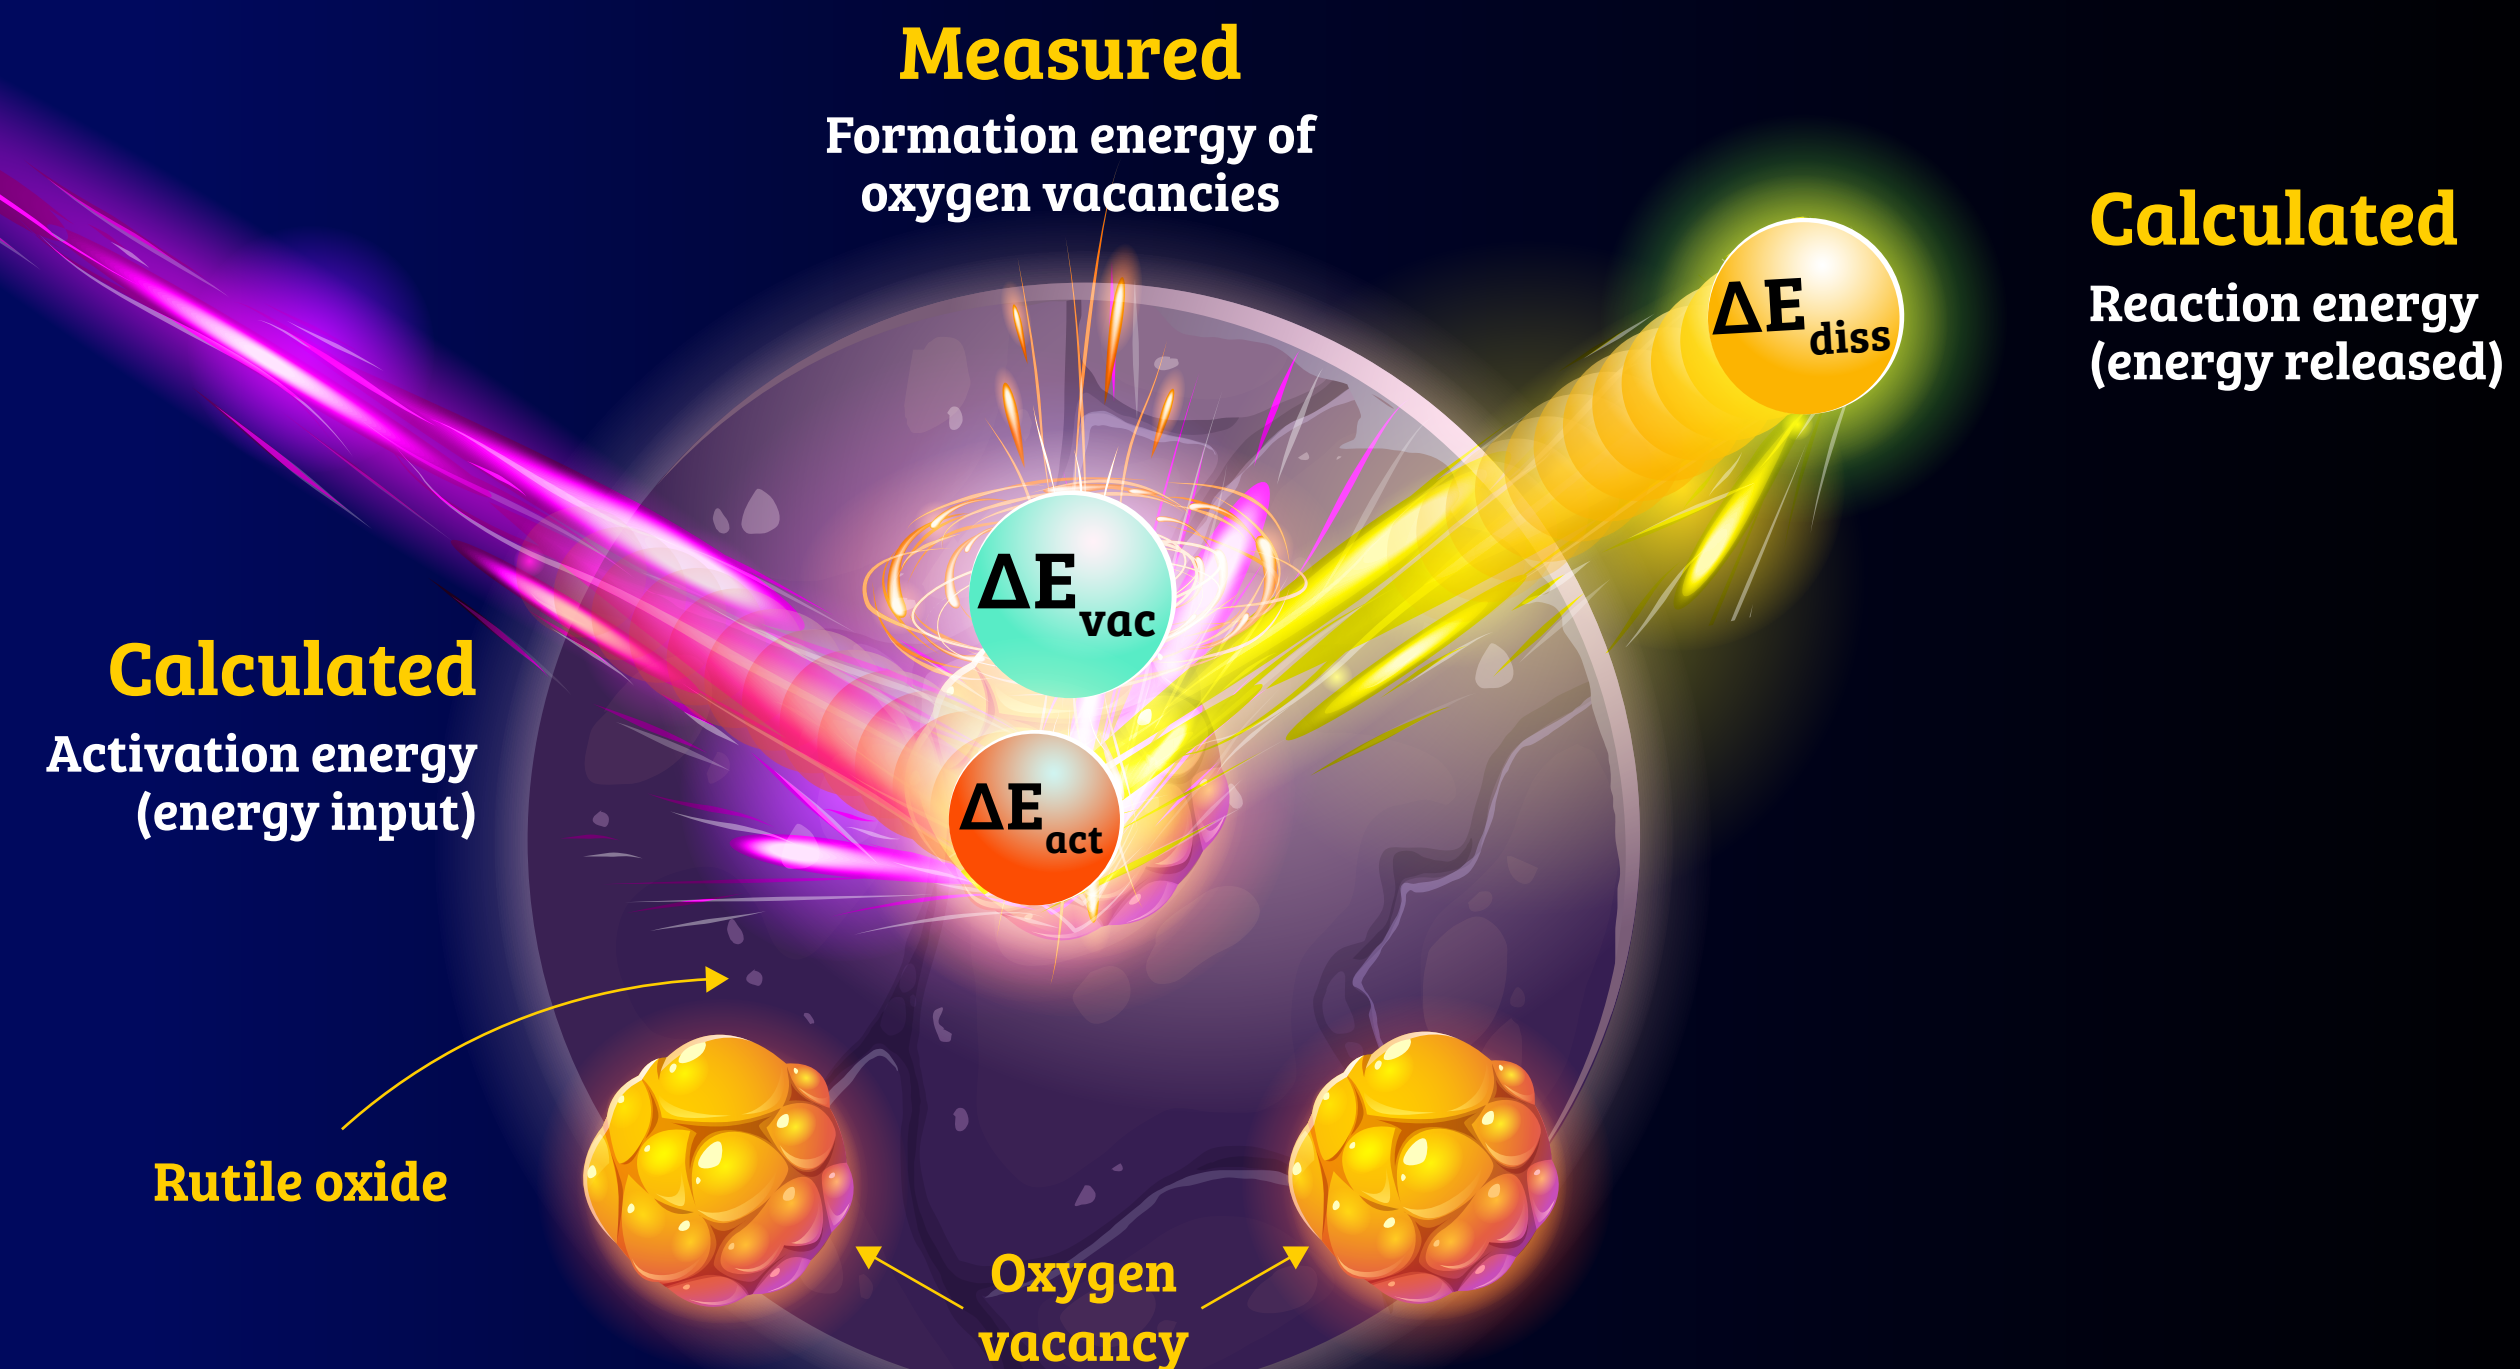

$\Delta E_{\text{vac}}$  (measurable and easily computable) is a simple and accurate descriptor of  $\Delta E_{\text{act}}$  and  $\Delta E_{\text{diss}}$  (both tedious to calculate) for rutile oxides

By using  $\Delta E_{\text{vac}}$  to determine the more complex  $\Delta E_{\text{act}}$ , rutile oxide catalyst designs can be enhanced for their more efficient industrial application
